# Supplementary material for: Rapid identification of specific DNA aptamers precisely targeting CD33 positive leukemia cells through a paired cell-based approach
Source: Royal Society of Chemistry journal article supplement (doi:10.1039/c8bm01393d), 2018-11-24

## Supporting Information

### **Rapid Identification of Specific DNA Aptamers Precisely Targeting CD33 Positive Leukemia Cells through Paired Cell Based Approach**

<sup>a,b</sup>Chang Yang<sup>§</sup>, <sup>a,b</sup>Yun Wang<sup>§</sup>, <sup>c</sup>Ming Hua Ge<sup>§</sup>, <sup>a,b</sup>Yu Jie Fu, <sup>a,b</sup>Rui Hao, <sup>a</sup>Khairul Islam, <sup>c</sup>Ping Huang, <sup>d</sup>Fu Chen, <sup>e</sup>Jie Sun, <sup>f</sup>De Fei Hong, <sup>a,b</sup>Hua Naranmandura\*

<sup>a</sup>Department of Pharmacology, School of Medicine; <sup>b</sup>Department of Toxicology, School of Medicine and Public Health, Zhejiang University, Hangzhou 310058, P.R. China; <sup>c</sup>Zhejiang Cancer Hospital, Hangzhou 310022, P.R. China; <sup>d</sup>College of Pharmaceutical Sciences, Zhejiang University, Hangzhou 310058, P.R. China; <sup>e</sup>Department of Hematology, the First Affiliated Hospital, Zhejiang University, Hangzhou 310003, P.R. China; <sup>f</sup>Zhejiang University School of Medicine Sir Run Run Shaw Hospital, Hangzhou 310016, P.R. China

## Supplementary Figure Legends

### **Fig.S1. Classical cell-based and protein-based systematic evolution of ligands by exponential enrichment (SELEX) approach**

**A)** Single stranded DNA pool containing different random sequences of 30-100n.t. ( $>10^{15}$  variant sequences) is incubated with a targeted positive live cells. Then, variants with the desired binding activity are recovered, followed by a negative selection step and then amplification of the enriched library by PCR. Employing this enriched PCR product, the single-stranded DNA pool is regenerated by template-strand removal. Typically, this process is repeated for several to more than 20 rounds for the identification of aptamers. **B)** Schematic representation of CD33 targeted aptamers selection by protein-based SELEX (for details please see experimental section).

### **Fig. S2. Binding affinity of ssDNA pool and selected aptamers to CD33 negative cells**

Representative ssDNA pool from each selection round (6~8) by CD33 recombinant Protein-Based SELEX (**A**) or ssDNA pool from each selection round (1~3) by paired cell based approach (**B**) were incubated with CD33 negative cells (Jurkat cells) and resultant cell binding was examined by flow cytometry.

### **Fig. S3. The binding affinities of aptamer S30 and S28 to CD33 positive cells**

Cell binding of FITC-labeled S30 (**A**) and S28 (**B**) aptamer was determined by flow cytometry after incubation with CD33 positive HL-60 cells at 37 °C for 30min. **C)** The free energies of all selected aptamers (including S15, 20, 23 ,28 and 30) were calculated by IDT-DNA. Data are representative of at least three independent experiments.

### **Fig.S4. Two-dimensional structure of S30 and its truncated aptamers**

**A)** Two-dimensional secondary structure of S30 and its truncated aptamers S30-T1 and S30-T2 by S30 were predicated by IDT analysis. **B)** The free energies of all aptamers were calculated from IDT-DNA.

### **Fig.S5. Determination of binding affinity of S30 with CD33 antigen by computational method and confocal microscopy**

**A)** Crystal structure of CD33 was simulated by *ab initio* method, as described in Method and Materials. CD33 antigen contains two major domains, namely, endo- and ectodomains, especially ectodomain further separated to C2 and V domains. **B)** Three-dimensional structures of selected DNA aptamers S15, 20, 23 and 30 were also further simulated by *ab initio* method and found that they contains 2 or 3 stem loops. **C)** In particular, aptamer S30 was found to specifically bind to C2 domain of CD33 by protein-DNA complex molecular dynamics simulation. Moreover, RFP-CD33 (red) transfected-293T cells (**D**) and CD33 positive HL-60 cells (**E**) were incubated with FITC-labeled S30 (green) at 4 °C for 30 min, and then determined by laser scanning confocal microscopy. Nuclei were stained with DAPI (blue).

**Fig.S6. Isolation of CD33 positive cells from mixture of CD33 positive and negative cell population by S30**

**A)** Separation procedure for isolating CD33 positive cells from mixture of CD33 positive (HL-60) and negative cell (Jurkat) population by S30. **B)** Each CD33 negative ( $5 \times 10^5$ ) and CD33 positive cells ( $5 \times 10^5$ ), or mixture of these two cells ( $5 \times 10^5$ ) were incubated with FITC-labeled S30 at 37 °C for 30min. After incubation, mixed cell populations were determined by flow cytometry. Mixed positive and negative cells without S30 were used as blank. Blue color indicates the binding of S30 with CD33 positive cells.

**Fig.S7. Internalization and release of S30-T1-Dox in CD33 negative cells**

**A)** CD33 negative Jurkat cells were incubated with 1  $\mu$ M of S30-T1-Dox conjugates at 37 °C for 3h, and washed twice with PBS and then cultured in drug free fresh medium for up to 24h. Internalization and release of Dox were confirmed by confocal microscope

**Fig S1**

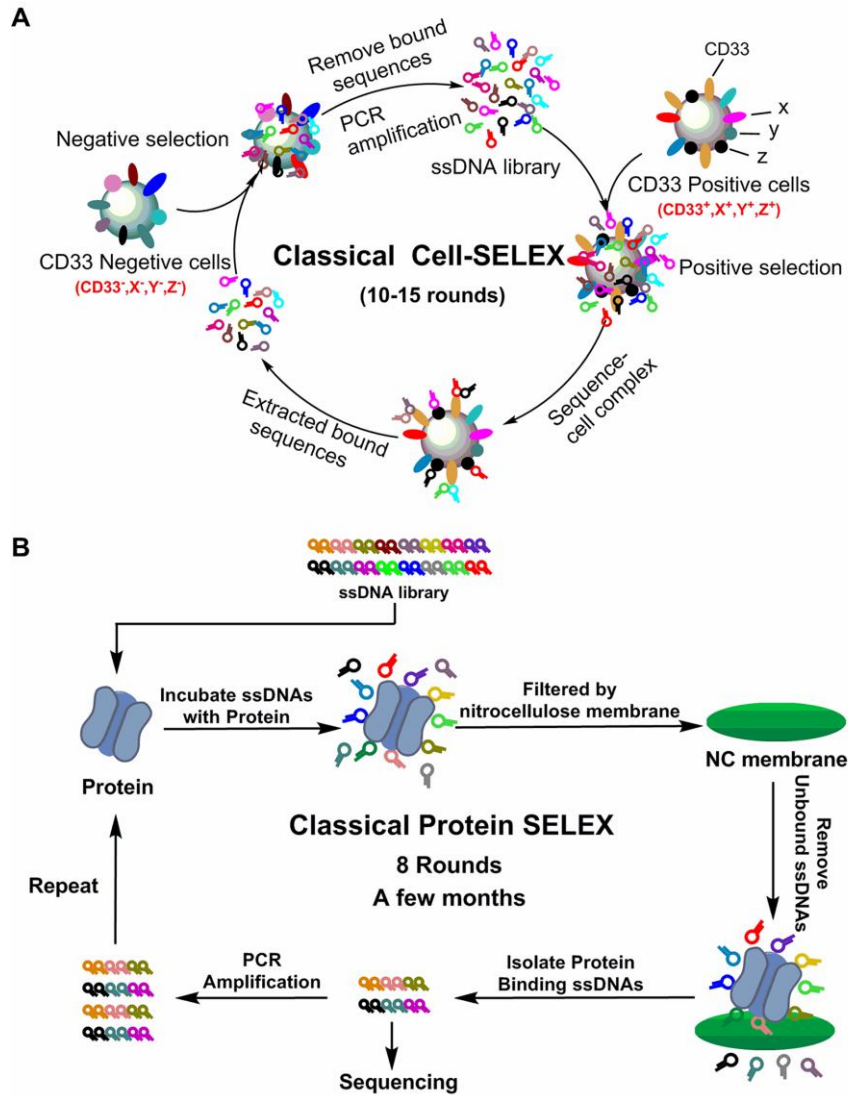

**Fig S2**

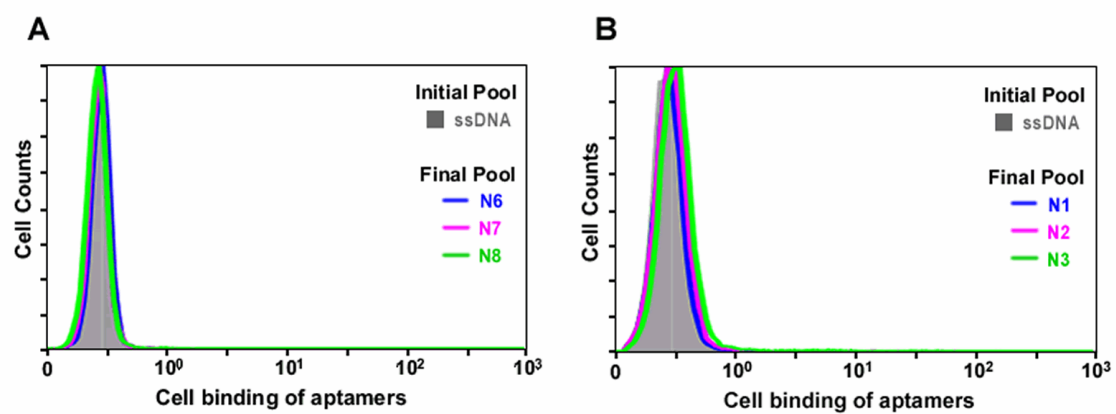

**Fig S3**

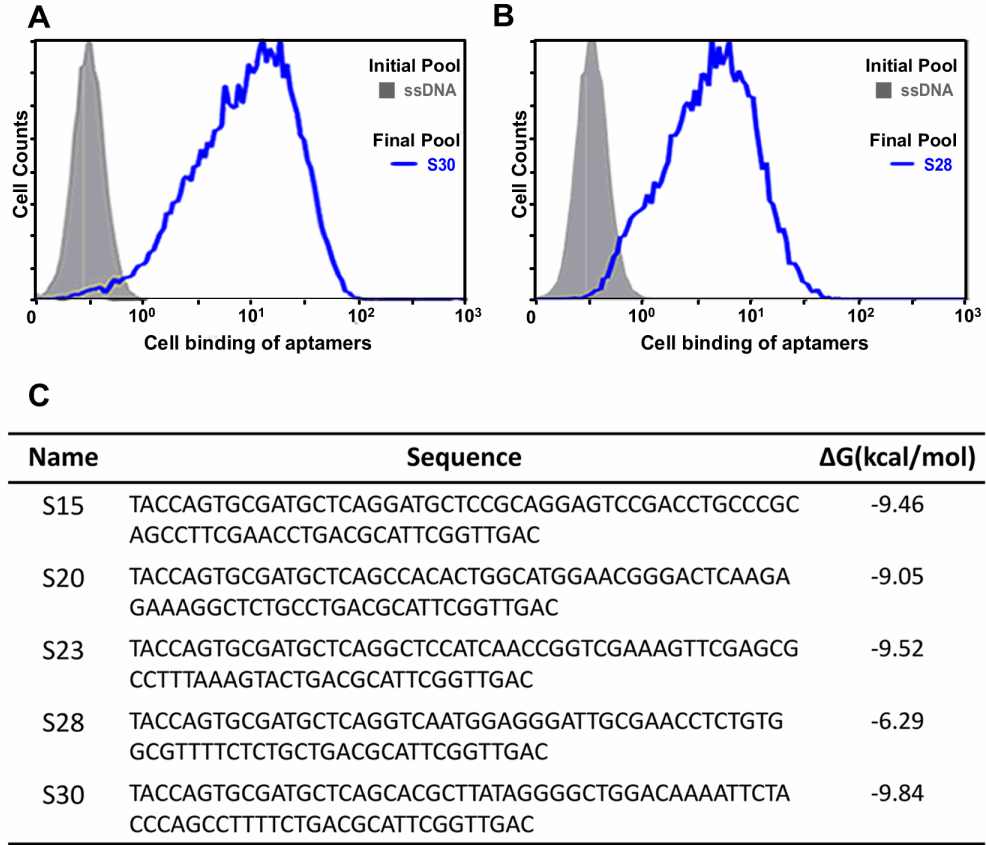

**Fig S4**

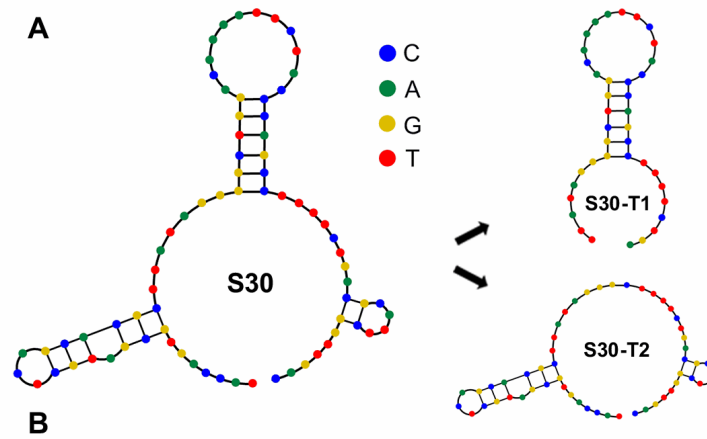

| Name   | Sequence                                                                        | $\Delta G(\text{kcal/mol})$ |
|--------|---------------------------------------------------------------------------------|-----------------------------|
| S30    | TACCAGTGCATGCTCAGCACGCTTATAGGGGCTGGACAAA<br>ATTCTACCCAGCCTTTTCTGACGCATTCGGTTGAC | -9.84                       |
| S30-T1 | TTATAGGGGCTGGACAAAATTCTACCCAGCCTTTTCTGA                                         | -5.87                       |
| S30-T2 | TACCAGTGCATGCTCAGCACGCTTATAGGGCTTTTCTGACG<br>CATTCGGTTGAC                       | -3.98                       |

**Fig S5**

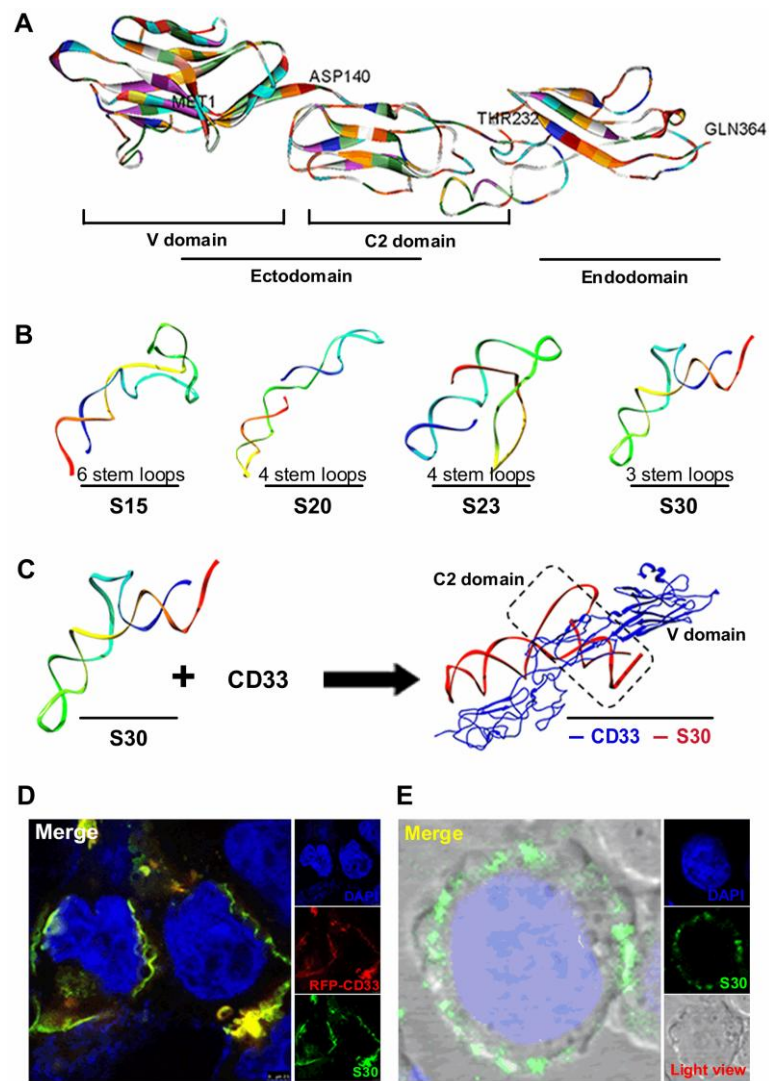



**Fig S6**

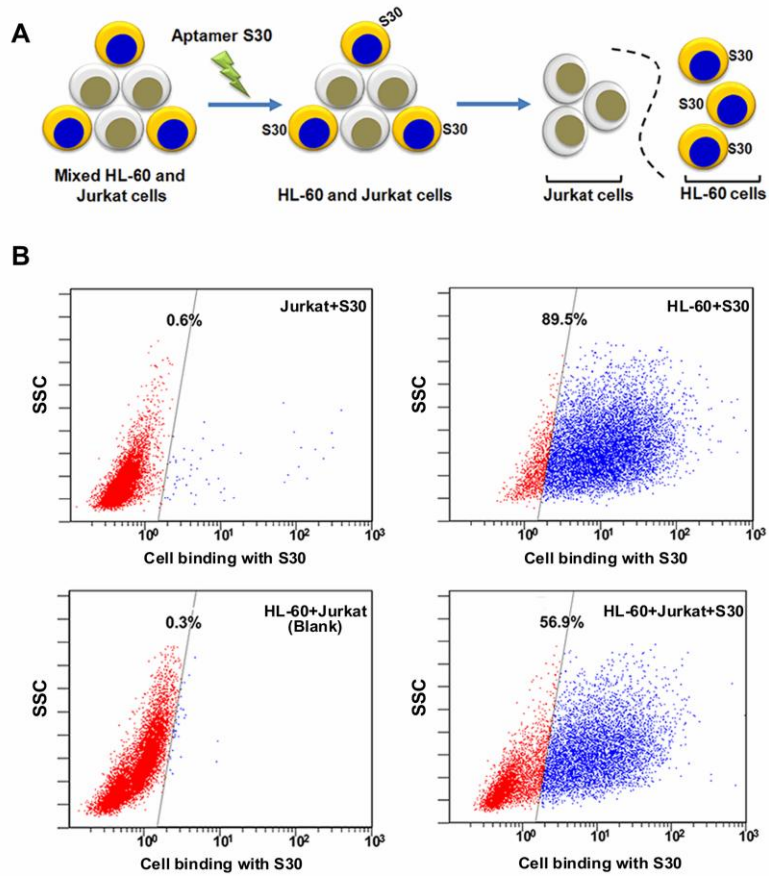

Fig.S7

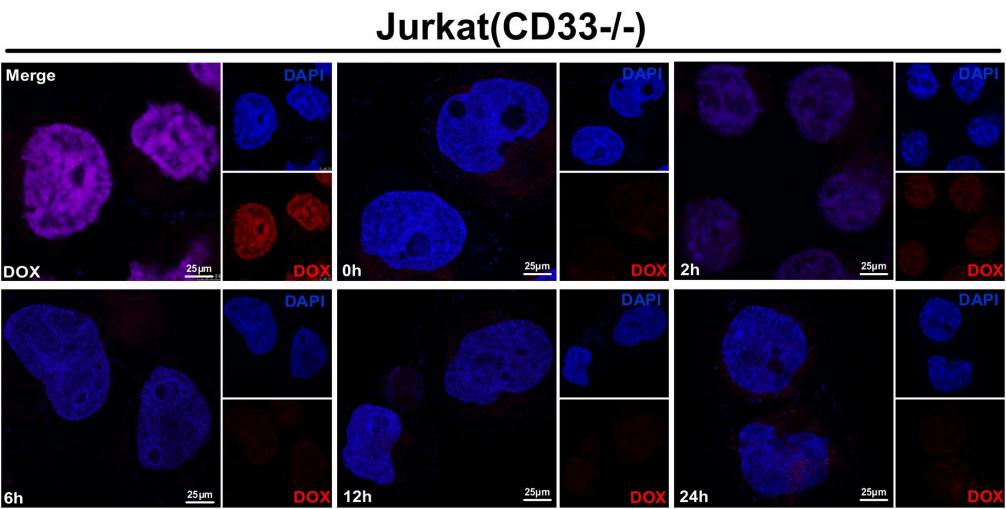

Supplement: c8bm01393d1.pdf [file c8bm01393d1.pdf]
